# Supplementary material
Source: publisher site journal article supplement (https://www.dovepress.com/get_supplementary_file.php?f=238942.docx)
Supplement: Supplementary file 1 [file get_supplementary_file.php]

**SUPPLEMENTARY TABLES**

**Supplementary Table 1** Clinical features and laboratory findings of diabetic cases with and without nephropathy.

| **a Clinical parameters** | **Cases without nephropathy (n=89)** | **Cases with nephropathy (n=11)** | ***P* value** |
| --- | --- | --- | --- |
| Urine Alb ( mg/24h) | 18 (9.75-21) | 66.5 (42.5-87) | <0.05 |
| Serum Cr (mg/dL) | 0.7 (0.7-0.8) | 0.9 (0.8-1.1) | <0.05 |
| ACR (mg/gr) | 21.97 (12-27.5) | 79.8 (48.7-106) | <0.05 |
| eGFR, mL/min/1.73m2 | 99.8 ± 18 | 63.4 ± 17 | <0.05 |

**a** Data are presented as mean±SD for parametric or median(Q1-Q3) for nonparametric parameters.

**Abbreviation:**  Alb, Albumin; DM, diabetes mellitus; eGFR, estimated glomerular filtration rate; ACR, Albumin-to-Creatinine ratio.

**Supplementary Table 2** Results from logistic regression for two *TLR4* variants

| **Variables** | **B** | **SE** | **Wald** | ***P*‐value** | **OR** | **95% CI** |
| --- | --- | --- | --- | --- | --- | --- |
| **a**OGTT | 0.003 | 0.001 | 3.901 | 0.048 | 1.003 | 1.00-1.005 |
| **b**DN | 1.470 | 0.729 | 4.072 | 0.044 | 4.35 | 1.04-18.1 |
| **b** TG | 0.005 | 0.002 | 3.886 | 0.027 | 1.005 | 1.001-1.01 |

**a**The association between Oral glucose tolerance test (OGTT) level and 896A>G polymorphism after adjusting for potential confounders such as age, sex, blood pressure (BP) and BMI were assessed using logic regression.

**b**The association between diabetic nephropathy (DN), triglyceride (TG) and 1196C>T polymorphism after adjusting for potential confounders such as age, sex, high blood pressure (BP) and BMI were assessed.

**Abbreviation:** B, correlation coefficient; CI, confidence interval; OR, odds ratio; SE, standard error; Wald, Wald statistics for logistic regression analysis.
